# Supplementary material for: Magnetic sense-dependent probabilistic decision-making in humans
Source: Front Neurosci. 2025 Mar 7;19:1497021. doi: 10.3389/fnins.2025.1497021 (PMC11925921; doi:10.3389/fnins.2025.1497021)
Supplement: Supplementary file 3 [file Data_Sheet_3.xlsx]

## Sheet: Anderson-Darling test
Figure	Panel	Data for analysis			Anderson-Darling test
		Gender	n	Experimental condition	h	P	cv	adstat
Fig. 2	A	M	50	Transparent screen, Fast (~ 20 h), Con	0	0.182028	0.739918	0.518068
Fig. 2	A	M	50	Transparent screen, Fast (~ 20 h), ≈ 0	1	0.0109181	0.739918	1.00218
Fig. 2	A	W	44	Transparent screen, Fast (~ 20 h), Con	0	0.0617975	0.738236	0.701974
Fig. 2	A	W	44	Transparent screen, Fast (~ 20 h), ≈ 0	1	0.0234254	0.738236	0.868508
Fig. 2	B	M	50	Opaque screen, Fast (~ 20 h), Con	0	0.0552031	0.739918	0.722916
Fig. 2	B	M	50	Opaque screen, Fast (~ 20 h), ≈ 0	1	0.0175	0.739918	0.921134
Fig. 2	B	W	44	Opaque screen, Fast (~ 20 h), Con	1	0.0433409	0.738236	0.762752
Fig. 2	B	W	44	Opaque screen, Fast (~ 20 h), ≈ 0	0	0.119358	0.738236	0.589453
Fig. 2	C	M	46	Opaque screen, Fast (~ 7 h), Con	0	0.10016	0.738846	0.619928
Fig. 2	C	M	46	Opaque screen, Fast (~ 7 h), ≈ 0	1	0.00887489	0.738846	1.03645
Fig. 2	C	W	50	Opaque screen, Fast (~ 7 h), Con	0	0.152291	0.739918	0.548854
Fig. 2	C	W	50	Opaque screen, Fast (~ 7 h), ≈ 0	1	0.023649	0.739918	0.868885
Fig. 2	D	M	46	Fast (~ 7 h), Opaque screen	0	0.510608	0.738846	0.331075
Fig. 2	D	M	50	Fast (~ 20 h), Opaque screen	1	0.0242831	0.739918	0.864325
Fig. 2	D	M	50	Fast (~ 20 h), Transparent screen	0	0.718218	0.739918	0.258266
Fig. 2	E	W	50	Fast (~ 7 h), Opaque screen	1	0.0118871	0.739918	0.987488
Fig. 2	E	W	44	Fast (~ 20 h), Opaque screen	0	0.128732	0.738236	0.576521
Fig. 2	E	W	44	Fast (~ 20 h), Transparent screen	0	0.0868675	0.738236	0.643782
Fig. 3	B	M	50	Step 1, Con	1	< 0.0005	0.739918	2.14507
Fig. 3	B	M	50	Step 1, ≈ 0	1	< 0.0005	0.739918	1.95613
Fig. 3	B	M	50	Step 2, Con	1	< 0.0005	0.739918	1.85072
Fig. 3	B	M	50	Step 2, ≈ 0	1	0.0012466	0.739918	1.38187
Fig. 3	C	M	50	Step 1, Odd, Con	1	< 0.0005	0.739918	1.98535
Fig. 3	C	M	50	Step 1, Odd, ≈ 0	1	< 0.0005	0.739918	1.5456
Fig. 3	C	M	50	Step 1, Even, Con	1	< 0.0005	0.739918	1.98535
Fig. 3	C	M	50	Step 1, Even, ≈ 0	1	0.00064071	0.739918	1.4985
Fig. 3	D	M	50	Step 2, Odd, Con	1	0.00106337	0.739918	1.4093
Fig. 3	D	M	50	Step 2, Odd, ≈ 0	1	0.00304956	0.739918	1.22447
Fig. 3	D	M	50	Step 2, Even, Con	1	0.00106337	0.739918	1.4093
Fig. 3	D	M	50	Step 2, Even, ≈ 0	1	0.00245371	0.739918	1.26287
Fig. 3	E	M	50	Step 1, Odd, Con	1	< 0.0005	0.739918	2.61686
Fig. 3	E	M	50	Step 1, Odd, ≈ 0	1	< 0.0005	0.739918	3.921
Fig. 3	E	M	50	Step 1, Even, Con	1	< 0.0005	0.739918	2.48044
Fig. 3	E	M	50	Step 1, Even, ≈ 0	1	< 0.0005	0.739918	2.51828
Fig. 3	F	M	50	Step 2, Odd, Con	1	< 0.0005	0.739918	2.24665
Fig. 3	F	M	50	Step 2, Odd, ≈ 0	1	< 0.0005	0.739918	2.46447
Fig. 3	F	M	50	Step 2, Even, Con	1	< 0.0005	0.739918	1.71428
Fig. 3	F	M	50	Step 2, Even, ≈ 0	1	< 0.0005	0.739918	2.26306
Fig. 4		M	50	Con	0	0.0552031	0.739918	0.722916
Fig. 4		M	50	RF1	0	0.0837745	0.739918	0.651419
Fig. 4		M	46	RF2	0	0.0722184	0.738846	0.675889
Fig. 5	B	M	50	Step 1, Con	1	< 0.0005	0.739918	2.14507
Fig. 5	B	M	50	Step 1, RF1	1	0.00153294	0.739918	1.34602
Fig. 5	B	M	50	Step 2, Con	1	< 0.0005	0.739918	1.85072
Fig. 5	B	M	50	Step 2, RF1	1	< 0.0005	0.739918	1.56253
Fig. 5	C	M	50	Step 1, Odd, Con	1	< 0.0005	0.739918	1.98535
Fig. 5	C	M	50	Step 1, Odd, RF1	1	< 0.0005	0.739918	2.92462
Fig. 5	C	M	50	Step 1, Even, Con	1	< 0.0005	0.739918	1.98535
Fig. 5	C	M	50	Step 1, Even, RF1	1	< 0.0005	0.739918	2.92462
Fig. 5	D	M	50	Step 2, Odd, Con	1	0.00106337	0.739918	1.4093
Fig. 5	D	M	50	Step 2, Odd, RF1	1	< 0.0005	0.739918	2.24649
Fig. 5	D	M	50	Step 2, Even, Con	1	0.00106337	0.739918	1.4093
Fig. 5	D	M	50	Step 2, Even, RF1	1	< 0.0005	0.739918	2.24649
Fig. 5	E	M	50	Step 1, Odd, Con	1	< 0.0005	0.739918	2.61686
Fig. 5	E	M	50	Step 1, Odd, RF1	1	< 0.0005	0.739918	2.2826
Fig. 5	E	M	50	Step 1, Even, Con	1	< 0.0005	0.739918	2.48044
Fig. 5	E	M	50	Step 1, Even, RF1	1	< 0.0005	0.739918	2.27425
Fig. 5	F	M	50	Step 2, Odd, Con	1	< 0.0005	0.739918	2.24665
Fig. 5	F	M	50	Step 2, Odd, RF1	1	< 0.0005	0.739918	2.29764
Fig. 5	F	M	50	Step 2, Even, Con	1	< 0.0005	0.739918	1.71428
Fig. 5	F	M	50	Step 2, Even, RF1	1	< 0.0005	0.739918	2.4407
