# Supplementary material for: Magnetic sense-dependent probabilistic decision-making in humans
Source: Front Neurosci. 2025 Mar 7;19:1497021. doi: 10.3389/fnins.2025.1497021 (PMC11925921; doi:10.3389/fnins.2025.1497021)
Supplement: Supplementary file 4 [file Data_Sheet_4.xlsx]

## Sheet: two sample t-test
#	Figure	Panel	Gender	Data for analysis, n		two sample t-test			Benjamini-Hochberg correction
						Significance	P	Confidence interval	Significance	Critical value
1	2	D	M	Fast (~ 7 h) Opaque, 46	Fast (~ 20 h) Transparent, 50	Yes	0.00872	[0.0491, 0.3307]	N/A (single comparison)
2	4		M	Con, 50	RF1, 50	Yes	0.02562	[0.6505, -]	Yes	0.0333
3	4		M	Con, 50	RF2, 46	No	0.60007	[-5.9575, 3.4445]	No	0.05
4	4		M	RF1, 50	RF2, 46	Yes	0.01363	[- , -1.4278]	Yes	0.0167
