# Supplementary material for: Magnetic sense-dependent probabilistic decision-making in humans
Source: Front Neurosci. 2025 Mar 7;19:1497021. doi: 10.3389/fnins.2025.1497021 (PMC11925921; doi:10.3389/fnins.2025.1497021)
Supplement: Supplementary file 11 [file Data_Sheet_11.xlsx]

## Sheet: Fig. 3A_Control
Trial (#)	1	2	3	4	5	6	7	8	9	10	11	12	13	14	15	16	17	18	19	20
Black stone_Control (1: success, 0: failure)	1	1	1	1	0	0	1	1	1	1	1	1	0	0	1	1	1	0	1	0
	0	1	0	0	0	1	1	0	0	0	0	1	1	1	0	0	0	0	0	1
	0	1	0	0	0	1	1	0	1	0	1	0	1	1	0	0	1	0	1	1
	0	0	0	1	1	0	1	0	1	0	1	1	0	1	1	0	1	0	0	0
	0	0	0	1	0	0	1	0	0	0	0	1	0	0	1	0	1	1	0	0
	0	0	1	1	1	0	1	1	1	1	1	0	0	0	1	0	1	0	1	0
	0	0	0	1	1	0	1	1	1	0	1	1	0	0	1	0	0	1	1	0
	0	1	1	0	1	1	0	1	0	0	1	1	1	0	1	1	0	1	1	1
	1	0	0	0	0	0	1	1	1	1	0	1	0	0	1	1	0	1	0	1
	1	1	1	1	0	1	1	1	0	1	0	1	1	1	1	1	0	0	0	1
	0	0	0	1	0	0	0	0	0	0	0	1	1	1	1	0	0	1	0	1
	1	0	0	1	0	1	0	1	1	1	0	1	0	1	1	0	0	1	1	1
	1	0	1	0	0	1	0	0	0	0	1	1	0	1	1	0	1	1	0	0
	1	1	0	1	1	0	1	1	1	1	0	0	1	1	0	0	0	0	1	1
	1	0	1	1	1	0	0	0	1	0	1	1	0	0	0	0	1	0	1	1
	0	1	0	0	1	0	0	1	1	0	1	0	0	0	1	0	0	1	0	1
	0	0	1	1	0	1	1	0	0	0	1	1	0	0	0	0	1	1	1	1
	0	0	1	1	0	1	0	1	1	1	1	0	1	0	0	1	0	1	1	1
	0	1	0	1	1	0	1	0	1	0	1	1	1	0	0	1	0	0	0	1
	0	0	0	1	1	1	1	1	1	1	1	0	0	1	1	1	0	0	0	1
	0	0	0	0	1	0	1	0	0	0	0	1	0	0	0	0	1	1	0	1
	0	0	0	1	1	1	1	0	0	0	1	0	0	1	0	0	0	1	0	1
	1	1	0	0	0	1	0	1	0	0	1	0	0	0	1	1	0	1	0	1
	1	1	1	0	1	0	1	0	1	0	0	1	1	1	1	0	0	1	0	0
	1	1	1	1	0	1	0	0	0	0	0	1	1	0	1	1	0	1	1	1
	0	0	0	0	0	0	0	1	0	0	1	0	0	0	1	1	1	1	1	0
	1	0	1	1	0	1	1	1	0	1	1	1	1	1	1	1	0	0	0	1
	1	0	1	0	1	1	0	0	1	1	0	1	0	1	1	0	0	1	0	0
	1	1	0	1	1	1	0	1	0	1	0	0	0	1	0	1	1	0	1	1
	1	1	0	0	0	1	1	0	0	0	1	1	0	0	1	1	0	0	1	0
	0	0	0	1	1	1	0	0	1	1	1	1	0	0	1	1	0	0	0	1
	0	1	1	0	1	1	0	0	1	1	0	1	1	1	1	0	1	0	1	1
	0	0	1	1	0	1	1	0	0	0	1	0	1	1	1	0	1	1	1	0
	1	0	1	0	1	0	0	0	0	0	0	1	0	1	1	1	1	0	0	0
	0	1	0	1	0	0	1	1	1	1	0	0	0	1	1	0	1	0	0	0
	1	0	1	0	1	0	1	1	0	1	0	1	1	1	1	1	0	0	1	0
	0	1	0	0	1	0	0	0	1	1	1	1	1	0	0	1	0	0	0	1
	0	1	0	1	0	1	0	1	1	0	1	0	0	1	1	0	0	0	0	1
	1	0	0	0	1	0	0	0	1	1	1	0	0	1	0	0	1	1	1	0
	0	0	0	1	1	0	1	0	1	1	1	0	0	0	0	1	0	0	0	1
	0	0	1	1	1	1	0	1	1	1	0	0	1	0	0	1	1	1	1	1
	1	0	0	1	1	1	0	0	0	1	1	0	0	1	0	0	0	0	0	1
	1	0	0	1	1	1	0	0	1	0	1	1	1	0	0	1	1	1	0	0
	0	0	1	0	1	1	1	1	0	0	1	1	1	1	1	1	1	1	1	0
	1	1	0	1	0	0	0	1	1	0	1	0	0	1	1	0	0	0	1	0
	1	0	1	0	0	0	1	1	0	1	1	1	0	1	1	0	0	0	0	1
	1	1	0	0	1	1	1	0	0	1	1	1	0	0	0	0	0	0	0	1
	0	0	0	0	1	1	1	0	0	0	1	0	0	0	1	1	0	1	0	1
	0	0	0	0	0	0	0	1	0	0	1	1	1	1	1	1	1	1	0	1
	1	1	1	1	0	0	1	1	1	0	1	1	1	0	1	0	1	1	0	1

## Sheet: Fig. 3A_Near-zero
Trial (#)	1	2	3	4	5	6	7	8	9	10	11	12	13	14	15	16	17	18	19	20
Black stone_Near-zero (1: success, 0: failure)	0	1	0	0	0	1	1	1	1	1	1	0	0	1	1	1	0	1	0	0
	1	1	0	0	0	0	0	1	0	1	0	0	0	0	0	1	1	0	1	1
	1	0	0	1	0	0	0	0	1	0	0	1	1	1	1	1	1	1	0	0
	1	1	0	1	0	1	0	0	1	1	0	0	1	0	0	1	0	1	1	0
	0	1	0	1	0	1	1	0	0	1	0	0	0	0	0	1	1	1	0	0
	0	1	0	1	0	1	0	1	1	0	1	0	0	1	0	0	1	1	1	0
	0	0	0	1	1	0	0	1	0	1	1	1	0	0	0	0	0	0	1	1
	0	1	0	0	1	0	1	0	1	0	1	1	1	0	0	1	1	1	0	0
	1	1	1	0	0	1	1	0	0	0	0	0	0	0	0	1	1	1	0	0
	0	0	0	1	1	1	0	0	0	0	0	0	0	1	0	1	1	0	1	0
	0	1	0	1	1	0	0	1	1	0	1	0	1	1	1	0	0	0	1	1
	0	1	1	1	1	0	1	0	0	0	1	1	1	1	0	1	1	1	1	0
	1	0	0	1	1	0	0	0	0	1	1	1	0	0	0	1	1	0	0	0
	0	0	1	0	0	0	0	0	1	0	0	0	1	1	0	1	0	1	0	1
	0	1	0	0	1	0	0	0	1	1	1	1	1	0	1	1	0	1	0	0
	1	1	0	1	1	0	0	0	0	0	1	1	0	1	0	0	0	0	0	0
	1	0	0	1	1	0	1	0	0	0	1	0	1	1	0	0	0	1	1	1
	0	1	0	0	0	0	0	1	0	1	0	0	1	0	1	1	1	0	0	0
	0	0	1	1	0	1	1	0	1	0	0	0	1	0	0	0	1	1	0	1
	0	0	0	1	0	1	1	0	1	0	0	1	0	0	0	1	0	1	0	0
	1	0	0	0	1	0	1	1	1	0	0	1	1	0	1	1	0	1	0	0
	0	0	0	1	1	1	1	0	0	0	1	0	0	1	0	0	0	1	0	1
	1	1	0	0	0	1	0	1	0	0	1	0	0	0	1	1	0	1	0	1
	1	0	0	0	1	0	1	1	0	0	0	0	0	1	0	1	1	0	1	1
	1	0	1	0	1	0	1	1	0	1	1	1	1	0	0	1	0	0	1	0
	1	0	1	0	1	0	0	0	0	0	1	1	0	1	0	1	1	0	0	1
	1	0	1	1	0	1	1	1	0	1	1	1	1	1	1	1	0	0	0	1
	1	0	1	0	1	1	0	0	1	1	0	1	0	1	1	0	0	1	0	0
	1	1	0	0	0	0	0	1	0	0	0	1	1	1	1	1	1	0	0	0
	0	1	0	0	1	1	0	1	1	1	0	0	0	0	1	0	0	1	0	0
	1	1	1	0	0	1	1	1	0	0	1	1	1	1	0	0	0	1	1	0
	0	0	0	0	0	0	0	0	1	1	0	1	1	1	0	1	1	1	1	0
	1	0	1	0	1	0	0	1	0	0	1	1	0	0	1	0	0	0	0	1
	0	1	1	0	0	0	1	1	1	0	0	0	1	1	1	1	1	1	1	1
	1	0	0	0	0	0	1	0	0	0	0	0	0	0	0	1	0	1	0	0
	1	1	1	1	0	1	1	1	0	0	1	1	0	1	0	1	1	1	0	0
	1	0	1	0	1	0	0	0	0	1	1	1	1	0	1	0	0	0	1	0
	1	1	0	0	1	0	0	1	0	0	1	0	1	1	1	0	1	0	0	0
	0	1	1	1	1	0	0	0	1	1	1	0	1	1	1	1	0	0	0	0
	1	1	0	1	1	0	1	0	0	0	0	0	0	1	0	0	0	1	0	1
	1	1	1	1	0	0	1	1	0	1	0	1	0	0	0	1	0	1	1	0
	0	1	0	0	1	0	0	0	1	1	0	0	1	0	1	0	1	1	0	0
	0	0	1	1	0	1	0	0	0	1	1	0	0	1	0	0	0	1	1	0
	0	0	0	0	1	1	1	0	1	1	1	0	1	1	0	1	0	1	0	0
	0	1	0	1	0	1	0	0	1	0	1	1	1	0	1	0	1	1	0	1
	0	1	0	1	0	1	1	0	1	0	0	1	0	1	0	1	1	0	1	1
	1	0	1	0	1	1	0	1	0	0	0	0	0	0	1	0	1	1	1	0
	0	1	0	0	0	1	1	1	0	1	0	0	0	0	0	0	0	1	1	0
	0	1	1	1	1	1	0	0	1	0	1	0	1	1	0	0	0	0	0	1
	1	0	0	1	1	0	1	0	1	0	1	0	1	1	1	0	1	0	1	0

## Sheet: Fig. 3B
Step	Step 1		Step 2
Magnetic field conditions	Control	Near-zero	Control	Near-zero
Black stone rate (%)	42	25	42	33
	25	25	8	8
	25	17	17	17
	17	33	33	17
	8	8	17	33
	25	33	42	17
	33	17	25	33
	33	17	25	33
	25	25	25	17
	50	17	25	8
	17	25	0	25
	17	25	42	33
	25	25	17	25
	33	0	33	17
	17	25	42	25
	25	25	17	25
	25	33	25	8
	33	25	25	0
	33	17	25	25
	33	17	33	25
	17	17	8	33
	33	25	25	17
	17	25	33	17
	42	8	17	25
	33	42	17	25
	8	33	8	8
	33	33	25	42
	33	25	25	33
	17	25	42	8
	25	17	25	33
	33	33	25	33
	25	17	33	8
	17	33	25	17
	25	17	8	25
	33	17	17	0
	33	42	25	33
	25	33	25	17
	17	17	33	25
	8	33	33	25
	33	17	17	25
	33	25	25	42
	25	17	25	17
	25	17	33	25
	33	17	25	33
	25	17	25	33
	33	33	25	17
	33	33	33	8
	8	25	25	17
	8	8	17	42
	33	33	42	25

## Sheet: Fig. 3C
Odd/even	Odd		Even
Magnetic field conditions	Control	Near-zero	Control	Near-zero
Odd/even rate (%)	50	50	50	50
	66.6667	83.3333	33.3333	16.6667
	50	66.6667	50	33.3333
	83.3333	66.6667	16.6667	33.3333
	16.6667	33.3333	83.3333	66.6667
	66.6667	50	33.3333	50
	50	33.3333	50	66.6667
	83.3333	66.6667	16.6667	33.3333
	66.6667	16.6667	33.3333	83.3333
	50	33.3333	50	66.6667
	33.3333	66.6667	66.6667	33.3333
	50	50	50	50
	83.3333	0	16.6667	100
	16.6667	66.6667	83.3333	33.3333
	33.3333	50	66.6667	50
	50	50	50	50
	33.3333	66.6667	66.6667	33.3333
	50	50	50	50
	66.6667	33.3333	33.3333	66.6667
	83.3333	66.6667	16.6667	33.3333
	66.6667	50	33.3333	50
	33.3333	33.3333	66.6667	66.6667
	66.6667	83.3333	33.3333	16.6667
	50	50	50	50
	83.3333	33.3333	16.6667	66.6667
	66.6667	33.3333	33.3333	66.6667
	66.6667	50	33.3333	50
	33.3333	33.3333	66.6667	66.6667
	66.6667	83.3333	33.3333	16.6667
	66.6667	66.6667	33.3333	33.3333
	50	50	50	50
	66.6667	83.3333	33.3333	16.6667
	33.3333	66.6667	66.6667	33.3333
	66.6667	16.6667	33.3333	83.3333
	66.6667	50	33.3333	50
	83.3333	33.3333	16.6667	66.6667
	16.6667	16.6667	83.3333	83.3333
	66.6667	50	33.3333	50
	66.6667	50	33.3333	50
	66.6667	16.6667	33.3333	83.3333
	33.3333	66.6667	66.6667	33.3333
	33.3333	33.3333	66.6667	66.6667
	50	33.3333	50	66.6667
	66.6667	50	33.3333	50
	16.6667	50	83.3333	50
	50	50	50	50
	33.3333	16.6667	66.6667	83.3333
	33.3333	50	66.6667	50
	83.3333	50	16.6667	33.3333
	66.6667	33.3333	33.3333	66.6667

## Sheet: Fig. 3D
Odd/even	Odd		Even
Magnetic field conditions	Control	Near-zero	Control	Near-zero
Odd/even rate (%)	50	66.6667	50	33.3333
	66.6667	66.6667	33.3333	33.3333
	66.6667	66.6667	33.3333	33.3333
	50	33.3333	50	66.6667
	50	66.6667	50	33.3333
	50	50	50	50
	66.6667	50	33.3333	50
	66.6667	50	33.3333	50
	33.3333	16.6667	66.6667	83.3333
	83.3333	33.3333	16.6667	66.6667
	33.3333	16.6667	66.6667	83.3333
	33.3333	50	66.6667	50
	50	33.3333	50	66.6667
	83.3333	50	16.6667	50
	0	0	100	100
	33.3333	83.3333	66.6667	16.6667
	16.6667	33.3333	83.3333	66.6667
	16.6667	66.6667	83.3333	33.3333
	83.3333	50	16.6667	50
	33.3333	33.3333	66.6667	66.6667
	50	16.6667	50	83.3333
	50	100	50	0
	66.6667	33.3333	33.3333	66.6667
	50	83.3333	50	16.6667
	83.3333	16.6667	16.6667	83.3333
	33.3333	50	66.6667	50
	16.6667	33.3333	83.3333	66.6667
	50	50	50	50
	50	66.6667	50	33.3333
	66.6667	33.3333	33.3333	66.6667
	0	16.6667	100	83.3333
	50	50	50	50
	50	50	50	50
	66.6667	83.3333	33.3333	16.6667
	33.3333	33.3333	66.6667	66.6667
	66.6667	33.3333	33.3333	66.6667
	50	50	50	50
	33.3333	50	66.6667	50
	50	66.6667	50	33.3333
	50	83.3333	50	16.6667
	33.3333	50	66.6667	50
	33.3333	16.6667	66.6667	83.3333
	33.3333	66.6667	66.6667	33.3333
	33.3333	66.6667	66.6667	33.3333
	33.3333	50	66.6667	50
	66.6667	33.3333	33.3333	66.6667
	50	33.3333	50	66.6667
	83.3333	66.6667	16.6667	33.3333
	16.6667	16.6667	83.3333	66.6667
	33.3333	50	66.6667	50

## Sheet: Fig. 3E
Odd/even	Odd		Even
Magnetic field conditions	Control	Near-zero	Control	Near-zero
Black stone (%) in odd/even	33.3333	33.3333	50	16.6667
	33.3333	33.3333	16.6667	16.6667
	33.3333	33.3333	16.6667	0
	33.3333	33.3333	0	33.3333
	0	0	16.6667	16.6667
	33.3333	33.3333	16.6667	33.3333
	33.3333	16.6667	33.3333	0
	50	0	16.6667	33.3333
	16.6667	0	33.3333	50
	50	33.3333	50	0
	0	16.6667	33.3333	33.3333
	33.3333	33.3333	0	16.6667
	33.3333	0	16.6667	50
	16.6667	0	50	0
	33.3333	50	0	0
	50	50	0	0
	16.6667	33.3333	33.3333	33.3333
	16.6667	16.6667	50	33.3333
	33.3333	16.6667	33.3333	16.6667
	66.6667	33.3333	0	0
	33.3333	0	0	33.3333
	33.3333	16.6667	33.3333	33.3333
	33.3333	33.3333	0	16.6667
	33.3333	0	50	16.6667
	50	33.3333	16.6667	50
	16.6667	33.3333	0	33.3333
	50	33.3333	16.6667	33.3333
	33.3333	16.6667	33.3333	33.3333
	33.3333	33.3333	0	16.6667
	33.3333	16.6667	16.6667	16.6667
	50	33.3333	16.6667	33.3333
	50	33.3333	0	0
	16.6667	33.3333	16.6667	33.3333
	33.3333	0	16.6667	33.3333
	33.3333	16.6667	33.3333	16.6667
	50	33.3333	16.6667	50
	16.6667	0	33.3333	66.6667
	16.6667	16.6667	16.6667	16.6667
	16.6667	16.6667	0	33.3333
	33.3333	33.3333	33.3333	33.3333
	0	33.3333	16.6667	33.3333
	33.3333	16.6667	33.3333	16.6667
	16.6667	0	50	50
	33.3333	0	16.6667	33.3333
	0	16.6667	50	16.6667
	50	33.3333	16.6667	0
	33.3333	0	16.6667	33.3333
	16.6667	33.3333	50	33.3333
	16.6667	16.6667	0	0
	50	33.3333	16.6667	33.3333

## Sheet: Fig. 3F
Odd/even	Odd		Even
Magnetic field conditions	Control	Near-zero	Control	Near-zero
Black stone (%) in odd/even	50	50	33.3333	16.6667
	16.6667	16.6667	0	0
	16.6667	16.6667	16.6667	16.6667
	33.3333	16.6667	33.3333	16.6667
	16.6667	33.3333	16.6667	33.3333
	50	33.3333	33.3333	0
	50	33.3333	0	16.6667
	50	33.3333	0	33.3333
	0	0	50	33.3333
	50	0	0	16.6667
	0	16.6667	0	33.3333
	33.3333	33.3333	50	33.3333
	16.6667	33.3333	16.6667	16.6667
	50	16.6667	16.6667	16.6667
	0	0	83.3333	50
	0	33.3333	33.3333	16.6667
	16.6667	0	33.3333	16.6667
	0	0	50	0
	33.3333	16.6667	16.6667	33.3333
	16.6667	33.3333	50	16.6667
	0	16.6667	16.6667	50
	50	33.3333	0	0
	33.3333	0	33.3333	33.3333
	16.6667	50	16.6667	0
	33.3333	16.6667	0	33.3333
	16.6667	0	0	16.6667
	0	33.3333	50	50
	33.3333	33.3333	16.6667	33.3333
	50	0	33.3333	16.6667
	33.3333	16.6667	16.6667	50
	0	16.6667	50	50
	16.6667	16.6667	50	0
	16.6667	16.6667	33.3333	16.6667
	16.6667	33.3333	0	16.6667
	0	0	33.3333	0
	16.6667	16.6667	33.3333	50
	33.3333	16.6667	16.6667	16.6667
	33.3333	50	33.3333	0
	50	33.3333	0	0
	33.3333	0	33.3333	16.6667
	16.6667	33.3333	50	16.6667
	33.3333	16.6667	0	33.3333
	33.3333	66.6667	16.6667	16.6667
	16.6667	0	33.3333	33.3333
	0	33.3333	66.6667	16.6667
	33.3333	0	16.6667	66.6667
	33.3333	16.6667	16.6667	50
	33.3333	33.3333	16.6667	0
	0	33.3333	33.3333	50
	33.3333	0	50	50
