# Supplementary material for: Magnetic sense-dependent probabilistic decision-making in humans
Source: Front Neurosci. 2025 Mar 7;19:1497021. doi: 10.3389/fnins.2025.1497021 (PMC11925921; doi:10.3389/fnins.2025.1497021)
Supplement: Supplementary file 12 [file Data_Sheet_12.xlsx]

## Sheet: Fig. 4
Magnetic field conditions	Control	RF1	RF2
Black stone (%)	70	45	50
	35	35	50
	50	40	55
	45	60	40
	30	50	50
	55	20	45
	50	35	55
	65	40	75
	50	55	65
	70	45	65
	35	60	25
	60	60	15
	45	40	50
	60	55	65
	50	55	50
	40	45	45
	50	50	60
	60	70	40
	50	55	60
	60	40	40
	30	40	75
	60	30	60
	45	55	50
	55	50	65
	60	30	55
	35	45	35
	55	40	50
	45	40	50
	50	60	55
	65	55	65
	55	35	25
	40	55	55
	45	50	60
	60	50	35
	45	50	65
	45	25	55
	45	60	60
	40	50	60
	60	55	55
	40	35	55
	55	60	40
	70	60	45
	60	40	75
	45	40	45
	45	35	45
	50	50	55
	45	45
	40	45
	50	45
	70	45
