# Supplementary material for: Magnetic sense-dependent probabilistic decision-making in humans
Source: Front Neurosci. 2025 Mar 7;19:1497021. doi: 10.3389/fnins.2025.1497021 (PMC11925921; doi:10.3389/fnins.2025.1497021)
Supplement: Supplementary file 13 [file Data_Sheet_13.xlsx]

## Sheet: Fig. 5A_Control
Trial (#)	1	2	3	4	5	6	7	8	9	10	11	12	13	14	15	16	17	18	19	20
Black stone_Control (1: success, 0: failure)	1	1	1	1	0	0	1	1	1	1	1	1	0	0	1	1	1	0	1	0
	0	1	0	0	0	1	1	0	0	0	0	1	1	1	0	0	0	0	0	1
	0	1	0	0	0	1	1	0	1	0	1	0	1	1	0	0	1	0	1	1
	0	0	0	1	1	0	1	0	1	0	1	1	0	1	1	0	1	0	0	0
	0	0	0	1	0	0	1	0	0	0	0	1	0	0	1	0	1	1	0	0
	0	0	1	1	1	0	1	1	1	1	1	0	0	0	1	0	1	0	1	0
	0	0	0	1	1	0	1	1	1	0	1	1	0	0	1	0	0	1	1	0
	0	1	1	0	1	1	0	1	0	0	1	1	1	0	1	1	0	1	1	1
	1	0	0	0	0	0	1	1	1	1	0	1	0	0	1	1	0	1	0	1
	1	1	1	1	0	1	1	1	0	1	0	1	1	1	1	1	0	0	0	1
	0	0	0	1	0	0	0	0	0	0	0	1	1	1	1	0	0	1	0	1
	1	0	0	1	0	1	0	1	1	1	0	1	0	1	1	0	0	1	1	1
	1	0	1	0	0	1	0	0	0	0	1	1	0	1	1	0	1	1	0	0
	1	1	0	1	1	0	1	1	1	1	0	0	1	1	0	0	0	0	1	1
	1	0	1	1	1	0	0	0	1	0	1	1	0	0	0	0	1	0	1	1
	0	1	0	0	1	0	0	1	1	0	1	0	0	0	1	0	0	1	0	1
	0	0	1	1	0	1	1	0	0	0	1	1	0	0	0	0	1	1	1	1
	0	0	1	1	0	1	0	1	1	1	1	0	1	0	0	1	0	1	1	1
	0	1	0	1	1	0	1	0	1	0	1	1	1	0	0	1	0	0	0	1
	0	0	0	1	1	1	1	1	1	1	1	0	0	1	1	1	0	0	0	1
	0	0	0	0	1	0	1	0	0	0	0	1	0	0	0	0	1	1	0	1
	0	0	0	1	1	1	1	0	0	0	1	0	0	1	0	0	0	1	0	1
	1	1	0	0	0	1	0	1	0	0	1	0	0	0	1	1	0	1	0	1
	1	1	1	0	1	0	1	0	1	0	0	1	1	1	1	0	0	1	0	0
	1	1	1	1	0	1	0	0	0	0	0	1	1	0	1	1	0	1	1	1
	0	0	0	0	0	0	0	1	0	0	1	0	0	0	1	1	1	1	1	0
	1	0	1	1	0	1	1	1	0	1	1	1	1	1	1	1	0	0	0	1
	1	0	1	0	1	1	0	0	1	1	0	1	0	1	1	0	0	1	0	0
	1	1	0	1	1	1	0	1	0	1	0	0	0	1	0	1	1	0	1	1
	1	1	0	0	0	1	1	0	0	0	1	1	0	0	1	1	0	0	1	0
	0	0	0	1	1	1	0	0	1	1	1	1	0	0	1	1	0	0	0	1
	0	1	1	0	1	1	0	0	1	1	0	1	1	1	1	0	1	0	1	1
	0	0	1	1	0	1	1	0	0	0	1	0	1	1	1	0	1	1	1	0
	1	0	1	0	1	0	0	0	0	0	0	1	0	1	1	1	1	0	0	0
	0	1	0	1	0	0	1	1	1	1	0	0	0	1	1	0	1	0	0	0
	1	0	1	0	1	0	1	1	0	1	0	1	1	1	1	1	0	0	1	0
	0	1	0	0	1	0	0	0	1	1	1	1	1	0	0	1	0	0	0	1
	0	1	0	1	0	1	0	1	1	0	1	0	0	1	1	0	0	0	0	1
	1	0	0	0	1	0	0	0	1	1	1	0	0	1	0	0	1	1	1	0
	0	0	0	1	1	0	1	0	1	1	1	0	0	0	0	1	0	0	0	1
	0	0	1	1	1	1	0	1	1	1	0	0	1	0	0	1	1	1	1	1
	1	0	0	1	1	1	0	0	0	1	1	0	0	1	0	0	0	0	0	1
	1	0	0	1	1	1	0	0	1	0	1	1	1	0	0	1	1	1	0	0
	0	0	1	0	1	1	1	1	0	0	1	1	1	1	1	1	1	1	1	0
	1	1	0	1	0	0	0	1	1	0	1	0	0	1	1	0	0	0	1	0
	1	0	1	0	0	0	1	1	0	1	1	1	0	1	1	0	0	0	0	1
	1	1	0	0	1	1	1	0	0	1	1	1	0	0	0	0	0	0	0	1
	0	0	0	0	1	1	1	0	0	0	1	0	0	0	1	1	0	1	0	1
	0	0	0	0	0	0	0	1	0	0	1	1	1	1	1	1	1	1	0	1
	1	1	1	1	0	0	1	1	1	0	1	1	1	0	1	0	1	1	0	1

## Sheet: Fig. 5A_RF1
Trial (#)	1	2	3	4	5	6	7	8	9	10	11	12	13	14	15	16	17	18	19	20
Black stone_RF1 (1: success 0: failure)	0	0	0	1	1	0	0	1	1	0	1	1	0	0	1	0	0	1	1	0
	1	0	0	0	1	0	0	0	0	0	0	1	1	0	1	1	1	0	0	0
	1	0	0	1	1	1	0	0	0	0	0	0	0	1	0	1	1	0	1	0
	1	0	0	0	0	1	1	1	1	1	1	1	1	0	1	1	0	0	0	1
	0	0	1	0	0	1	0	0	0	0	0	1	1	1	1	1	1	1	0	1
	1	0	0	0	0	0	0	0	0	1	0	0	1	1	0	0	0	0	0	0
	0	0	1	0	1	1	0	0	0	0	1	0	0	1	0	0	1	0	0	1
	0	1	0	0	0	0	0	1	1	1	1	0	1	1	0	0	0	1	0	0
	0	0	0	0	1	1	0	1	0	1	1	1	0	1	1	1	1	1	0	0
	0	1	1	1	1	1	0	0	1	1	1	0	0	0	0	1	0	0	0	0
	0	1	0	0	0	1	1	1	1	1	1	0	1	1	1	1	0	0	1	0
	1	1	1	1	0	0	1	0	0	0	0	1	1	1	1	0	1	0	1	1
	1	0	1	1	0	0	1	0	1	0	1	0	0	1	0	1	0	0	0	0
	0	0	1	0	1	0	1	1	0	1	1	0	0	1	0	1	1	1	1	0
	0	1	1	0	1	1	0	1	1	0	1	0	0	1	1	0	1	1	0	0
	1	0	1	0	0	1	0	1	0	0	1	0	0	1	1	0	0	0	1	1
	0	0	0	1	0	1	0	0	0	0	1	0	1	1	1	1	1	1	1	0
	1	0	1	1	0	1	0	0	1	0	1	1	1	0	1	1	1	1	1	1
	0	0	1	0	1	0	1	1	1	0	1	1	0	1	0	1	0	1	1	0
	0	1	0	0	0	0	1	0	0	1	0	0	1	0	1	0	0	1	1	1
	1	1	0	1	1	0	0	0	0	0	1	1	1	0	0	0	0	0	1	0
	0	0	0	0	0	0	1	1	0	0	0	1	1	0	0	0	1	0	0	1
	1	0	0	0	0	1	1	0	1	0	1	1	0	0	1	1	0	1	1	1
	0	0	0	1	1	0	1	0	0	1	1	1	0	0	1	0	1	0	1	1
	0	0	0	1	0	0	0	0	0	0	0	1	1	1	0	0	0	1	1	0
	0	0	0	1	0	1	1	1	1	0	0	1	1	1	1	0	0	0	0	0
	0	1	1	0	1	1	1	0	0	0	0	0	0	1	0	1	0	1	0	0
	1	1	0	0	1	0	1	0	1	0	1	0	0	1	0	1	0	0	0	0
	1	0	0	1	0	0	0	1	0	1	1	0	0	1	0	1	1	1	1	0
	0	0	0	1	1	0	0	0	0	1	1	1	0	1	1	1	1	0	1	0
	1	1	1	0	0	1	1	1	1	0	0	1	0	0	0	1	1	0	1	1
	0	0	1	0	1	0	1	1	1	1	1	0	1	1	1	0	0	1	1	0
	0	1	1	0	0	0	1	1	1	1	0	1	1	1	1	1	0	1	0	0
	1	1	1	1	1	1	0	0	1	1	0	0	0	1	0	1	0	0	0	1
	0	0	1	1	1	0	1	0	0	1	1	1	0	0	0	0	1	1	1	0
	0	1	0	0	0	0	1	0	1	0	0	0	0	0	0	1	0	1	0	0
	0	0	1	1	0	0	0	0	1	0	1	1	0	1	0	0	0	0	0	1
	1	1	0	0	1	0	0	1	1	1	1	1	0	1	0	0	0	0	1	1
	0	1	0	1	0	1	1	1	1	0	0	0	1	1	1	1	1	1	0	0
	0	0	1	1	1	0	0	1	0	1	1	1	0	0	0	1	1	1	0	0
	1	0	0	0	1	0	1	0	0	0	0	0	0	1	1	1	0	1	1	0
	0	1	0	1	0	0	0	0	1	1	1	0	1	0	0	0	1	1	0	0
	1	0	1	1	0	0	0	1	0	1	0	1	1	1	0	0	1	1	0	1
	1	1	0	1	0	1	0	1	0	0	0	1	0	0	0	0	0	1	0	0
	0	1	0	0	0	1	0	1	0	0	0	1	1	1	0	0	0	1	0	0
	0	1	1	1	1	1	0	1	0	1	0	0	1	0	1	0	1	0	0	0
	0	1	1	0	1	0	0	0	1	0	0	0	0	1	0	1	1	1	1	0
	0	0	0	1	0	0	1	1	0	0	0	1	1	1	1	1	0	0	1	0
	0	1	0	1	0	0	0	0	1	0	1	0	0	1	0	1	1	1	1	0
	0	0	0	1	1	1	0	1	1	0	1	1	1	0	0	0	0	0	0	1

## Sheet: Fig. 5B
Step	Step 1		Step 2
Magnetic field conditions	Control	RF1	Control	RF1
Black stone (%)	42	25	42	25
	25	8	8	17
	25	17	17	17
	17	33	33	33
	8	8	17	17
	25	8	42	8
	33	25	25	8
	33	25	25	17
	25	17	25	33
	50	33	25	33
	17	33	0	25
	17	25	42	25
	25	42	17	8
	33	17	33	33
	17	33	42	25
	25	17	17	25
	25	17	25	8
	33	33	25	25
	33	42	25	17
	33	17	33	8
	17	25	8	25
	33	8	25	17
	17	33	33	17
	42	25	17	25
	33	0	17	17
	8	33	8	17
	33	17	25	25
	33	8	25	42
	17	17	42	25
	25	25	25	17
	33	33	25	33
	25	17	33	42
	17	25	25	33
	25	33	8	33
	33	33	17	25
	33	8	25	17
	25	25	25	17
	17	33	33	33
	8	17	33	33
	33	33	17	25
	33	25	25	0
	25	25	25	17
	25	17	33	33
	33	42	25	8
	25	0	25	33
	33	42	25	17
	33	25	33	8
	8	25	25	8
	8	17	17	17
	33	33	42	25

## Sheet: Fig. 5C
Odd/even	Odd		Even
Magnetic field conditions	Control	RF1	Control	RF1
Odd/even (%)	50	33.3333	50	66.6667
	66.6667	66.6667	33.3333	33.3333
	50	33.3333	50	66.6667
	83.3333	16.6667	16.6667	83.3333
	16.6667	50	83.3333	50
	66.6667	16.6667	33.3333	83.3333
	50	66.6667	50	33.3333
	83.3333	33.3333	16.6667	66.6667
	66.6667	16.6667	33.3333	83.3333
	50	50	50	50
	33.3333	66.6667	66.6667	33.3333
	50	50	50	50
	83.3333	33.3333	16.6667	66.6667
	16.6667	50	83.3333	50
	33.3333	66.6667	66.6667	33.3333
	50	66.6667	50	33.3333
	33.3333	16.6667	66.6667	83.3333
	50	16.6667	50	83.3333
	66.6667	16.6667	33.3333	83.3333
	83.3333	50	16.6667	50
	66.6667	66.6667	33.3333	33.3333
	33.3333	33.3333	66.6667	66.6667
	66.6667	16.6667	33.3333	83.3333
	50	66.6667	50	33.3333
	83.3333	50	16.6667	50
	66.6667	50	33.3333	50
	66.6667	50	33.3333	50
	33.3333	33.3333	66.6667	66.6667
	66.6667	66.6667	33.3333	33.3333
	66.6667	33.3333	33.3333	66.6667
	50	33.3333	50	66.6667
	66.6667	66.6667	33.3333	33.3333
	33.3333	50	66.6667	50
	66.6667	50	33.3333	50
	66.6667	66.6667	33.3333	33.3333
	83.3333	50	16.6667	50
	16.6667	16.6667	83.3333	83.3333
	66.6667	66.6667	33.3333	33.3333
	66.6667	33.3333	33.3333	66.6667
	66.6667	50	33.3333	50
	33.3333	66.6667	66.6667	33.3333
	33.3333	66.6667	66.6667	33.3333
	50	66.6667	50	33.3333
	66.6667	33.3333	33.3333	66.6667
	16.6667	66.6667	83.3333	33.3333
	50	66.6667	50	33.3333
	33.3333	16.6667	66.6667	83.3333
	33.3333	66.6667	66.6667	33.3333
	83.3333	66.6667	16.6667	33.3333
	66.6667	33.3333	33.3333	66.6667

## Sheet: Fig. 5D
Odd/even	Odd		Even
Magnetic field conditions	Control	RF1	Control	RF1
Odd/even (%)	50	50	50	50
	66.6667	50	33.3333	50
	66.6667	50	33.3333	50
	50	50	50	50
	50	66.6667	50	33.3333
	50	33.3333	50	66.6667
	66.6667	50	33.3333	50
	66.6667	66.6667	33.3333	33.3333
	33.3333	16.6667	66.6667	83.3333
	83.3333	33.3333	16.6667	66.6667
	33.3333	66.6667	66.6667	33.3333
	33.3333	33.3333	66.6667	66.6667
	50	33.3333	50	66.6667
	83.3333	66.6667	16.6667	33.3333
	0	0	100	100
	33.3333	33.3333	66.6667	66.6667
	16.6667	50	83.3333	50
	16.6667	50	83.3333	50
	83.3333	66.6667	16.6667	33.3333
	33.3333	50	66.6667	50
	50	66.6667	50	33.3333
	50	16.6667	50	83.3333
	66.6667	50	33.3333	50
	50	16.6667	50	83.3333
	83.3333	83.3333	16.6667	16.6667
	33.3333	33.3333	66.6667	66.6667
	16.6667	83.3333	83.3333	16.6667
	50	50	50	50
	50	50	50	50
	66.6667	33.3333	33.3333	66.6667
	0	50	100	50
	50	0	50	100
	50	83.3333	50	16.6667
	66.6667	50	33.3333	50
	33.3333	50	66.6667	50
	66.6667	50	33.3333	50
	50	50	50	50
	33.3333	66.6667	66.6667	33.3333
	50	66.6667	50	33.3333
	50	66.6667	50	33.3333
	33.3333	50	66.6667	50
	33.3333	50	66.6667	50
	33.3333	50	66.6667	50
	33.3333	66.6667	66.6667	33.3333
	33.3333	16.6667	66.6667	83.3333
	66.6667	50	33.3333	50
	50	16.6667	50	83.3333
	83.3333	50	16.6667	50
	16.6667	50	83.3333	50
	33.3333	66.6667	66.6667	33.3333

## Sheet: Fig. 5E
Odd/even	Odd		Even
Magnetic field conditions	Control	RF1	Control	RF1
Black stone (%) in odd/even	33.3333	16.6667	50	33.3333
	33.3333	0	16.6667	16.6667
	33.3333	16.6667	16.6667	16.6667
	33.3333	16.6667	0	50
	0	0	16.6667	16.6667
	33.3333	0	16.6667	16.6667
	33.3333	33.3333	33.3333	16.6667
	50	0	16.6667	50
	16.6667	16.6667	33.3333	16.6667
	50	33.3333	50	33.3333
	0	50	33.3333	16.6667
	33.3333	16.6667	0	33.3333
	33.3333	33.3333	16.6667	50
	16.6667	0	50	33.3333
	33.3333	33.3333	0	33.3333
	50	33.3333	0	0
	16.6667	0	33.3333	33.3333
	16.6667	16.6667	50	50
	33.3333	16.6667	33.3333	66.6667
	66.6667	16.6667	0	16.6667
	33.3333	33.3333	0	16.6667
	33.3333	0	33.3333	16.6667
	33.3333	0	0	66.6667
	33.3333	50	50	0
	50	0	16.6667	0
	16.6667	33.3333	0	33.3333
	50	16.6667	16.6667	16.6667
	33.3333	16.6667	33.3333	0
	33.3333	33.3333	0	0
	33.3333	16.6667	16.6667	33.3333
	50	16.6667	16.6667	50
	50	33.3333	0	0
	16.6667	33.3333	16.6667	16.6667
	33.3333	33.3333	16.6667	33.3333
	33.3333	33.3333	33.3333	33.3333
	50	0	16.6667	16.6667
	16.6667	0	33.3333	50
	16.6667	50	16.6667	16.6667
	16.6667	33.3333	0	16.6667
	33.3333	16.6667	33.3333	33.3333
	0	16.6667	16.6667	16.6667
	33.3333	33.3333	33.3333	33.3333
	16.6667	33.3333	50	16.6667
	33.3333	16.6667	16.6667	33.3333
	0	16.6667	50	16.6667
	50	66.6667	16.6667	16.6667
	33.3333	0	16.6667	0
	16.6667	50	50	33.3333
	16.6667	16.6667	0	16.6667
	50	33.3333	16.6667	33.3333

## Sheet: Fig. 5F
Odd/even	Odd		Even
Magnetic field conditions	Control	RF1	Control	RF1
Black stone (%) in odd/even	50	16.6667	33.3333	33.3333
	16.6667	16.6667	0	16.6667
	16.6667	16.6667	16.6667	16.6667
	33.3333	33.3333	33.3333	33.3333
	16.6667	33.3333	16.6667	0
	50	0	33.3333	16.6667
	50	16.6667	0	0
	50	33.3333	0	0
	0	0	50	66.6667
	50	33.3333	0	33.3333
	0	33.3333	0	16.6667
	33.3333	33.3333	50	16.6667
	16.6667	0	16.6667	16.6667
	50	50	16.6667	16.6667
	0	0	83.3333	50
	0	0	33.3333	50
	16.6667	0	33.3333	16.6667
	0	50	50	0
	33.3333	16.6667	16.6667	16.6667
	16.6667	0	50	16.6667
	0	33.3333	16.6667	16.6667
	50	0	0	33.3333
	33.3333	33.3333	33.3333	0
	16.6667	0	16.6667	50
	33.3333	16.6667	0	16.6667
	16.6667	16.6667	0	16.6667
	0	33.3333	50	16.6667
	33.3333	50	16.6667	33.3333
	50	16.6667	33.3333	33.3333
	33.3333	33.3333	16.6667	0
	0	33.3333	50	33.3333
	16.6667	0	50	83.3333
	16.6667	66.6667	33.3333	0
	16.6667	33.3333	0	33.3333
	0	33.3333	33.3333	16.6667
	16.6667	16.6667	33.3333	16.6667
	33.3333	16.6667	16.6667	16.6667
	33.3333	66.6667	33.3333	0
	50	16.6667	0	0
	33.3333	16.6667	33.3333	0
	16.6667	33.3333	50	33.3333
	33.3333	16.6667	0	33.3333
	33.3333	0	16.6667	0
	16.6667	33.3333	33.3333	0
	0	16.6667	66.6667	50
	33.3333	0	16.6667	16.6667
	33.3333	16.6667	16.6667	50
	33.3333	33.3333	16.6667	0
	0	33.3333	33.3333	0
	33.3333	33.3333	50	16.6667
