# Supplementary material for: Magnetic sense-dependent probabilistic decision-making in humans
Source: Frontiers journal article supplement (doi:10.3389/fnins.2025.1497021), 2025-03-07
Supplement: Table_1.pdf [file Table_1.pdf]

**Table S1. Magnetic field parameters for modulated GMF experiments.**

| MF          | Player seat <sup>a</sup> | Components ( $\mu\text{T}$ ) |          |          | Total Intensity ( $\mu\text{T}$ ) | Relative total Intensity (%) <sup>b</sup> |
|-------------|--------------------------|------------------------------|----------|----------|-----------------------------------|-------------------------------------------|
|             |                          | <i>X</i>                     | <i>Y</i> | <i>Z</i> |                                   |                                           |
| Con         | N                        | 30.7                         | − 6.6    | 32.4     | 45.1                              | 100                                       |
|             | S                        | 29.3                         | − 4.1    | 33.2     | 44.5                              | 99                                        |
| $\approx 0$ | N                        | 0.0                          | 0.0      | 0.0      | 0.0                               | 0 <sup>c</sup>                            |
|             | S                        | 17.8                         | − 5.8    | 34.4     | 39.2                              | 88 <sup>d</sup>                           |

The intensities of the magnetic fields were the means from measurements on the glabella of the three subjects with the highest, median, and the lowest sitting height on the chair.<sup>a</sup> The north seat (N) and south seat (S) are located at the center and outside of the Helmholtz coils, respectively, on the geomagnetic north-south axis.<sup>b</sup> The relative total intensity of the S-seat magnetic field was compared to that of the corresponding N-seat in each GMF condition.<sup>c,d</sup> Relative total intensity at the N and S seats in the  $\approx 0$  condition was compared with the total intensity at the N and S seats in the Con condition, respectively. MF, magnetic field. MF conditions were named with respect to the N seat; Con, the ambient GMF;  $\approx 0$ , near-zero GMF.
